# Supplementary material for: Evaluation of Haloferax mediterranei Strain R4 Capabilities for Cadmium Removal from Brines
Source: MDPI journal article supplement (doi:10.3390/md21020072), 2023-01-21
Supplement: s1 [file s1]

# Supplementary Material

## Evaluation of *Haloferax mediterranei* Strain R4 Capabilities for Cadmium Removal from Brines

Iraide Saez-Zamacona <sup>1</sup>, Guillermo Grindlay <sup>2</sup> and Rosa María Martínez-Espinosa <sup>1,3,\*</sup>

<sup>1</sup> Multidisciplinary Institute for Environmental Studies “Ramón Margalef”, University of Alicante, Ap. 99, E-03080 Alicante, Spain

<sup>2</sup> Department of Analytical Chemistry, Nutrition and Food Sciences, Faculty of Sciences, University of Alicante, Ap. 99, E-03080 Alicante, Spain

<sup>3</sup> Biochemistry, Molecular Biology, Edaphology and Agricultural Chemistry Department, Faculty of Sciences, University of Alicante, Ap. 99, E-03080 Alicante, Spain

\* Correspondence: rosa.martinez@ua.es; Tel.: +349-6590-3400 (ext. 1258 or 8841)

**Table S1.** Microorganisms with bioremediation potential for different metals. Note: NS=Non stated.

| Specie                                   | Metal   | Concentration          | Field                                                                                                   | Description                                                                                                                                               | Reference |
|------------------------------------------|---------|------------------------|---------------------------------------------------------------------------------------------------------|-----------------------------------------------------------------------------------------------------------------------------------------------------------|-----------|
| <i>Chlamydomonas</i> sp.                 | Cd (II) | < 0.8 mM               | Organisms isolated from Cd-contaminated sites; <i>Ex situ</i> laboratory assay                          | Tolerance and accumulation of Cd; The higher Cd concentration and the larger exposure time result in a higher accumulation of Cd                          | [1]       |
| <i>Thiobacillus ferrooxidans</i> DSM 583 | Cd (II) | 1 M                    | <i>Ex situ</i> laboratory under way of being implemented in the treatment of real industrial discharges | Growth decreases when [Cd] ≥ 50mM; It accumulates Cd at acidic pH (1.6-6)                                                                                 | [2]       |
| <i>Halococcus salifodinae</i> BK6        | Cd (II) | 2 mM                   | <i>Ex situ</i> laboratory assay                                                                         | Gradual reduction of growth and pigmentation when Cd concentration increases                                                                              | [3]       |
| <i>Haloferax volcanii</i> BBK2           |         | 1 mM                   |                                                                                                         | Growth reduces when [Cd] ≥ 0.5mM                                                                                                                          |           |
| <i>Haloarcula japonica</i> BS2           |         | 2 mM                   |                                                                                                         | Gradual reduction of growth and pigmentation when Cd concentration increases                                                                              |           |
| <i>Halorubrum</i> sp. BS17               |         | < 0.5 mM               |                                                                                                         | There is not tolerance to Cd at tested concentrations                                                                                                     |           |
| <i>Haloferax volcanii</i> BBK2           | Cd (II) | 1 mM                   | <i>Ex situ</i> laboratory assay                                                                         | Tolerance to 4mM of Cd showing a significant growth reduction; The maximum accumulation of Cd was at [Cd] = 0.5mM                                         | [4]       |
| <i>Pseudomonas stutzeri</i> LA3          | Cu (II) | 400 mg L <sup>-1</sup> | <i>Ex situ</i> laboratory assay                                                                         | Removal percentage is indirectly proportional to Cu (II) concentration in the medium; Highest removal percentage was at [Cu (II)] = 50 mg L <sup>-1</sup> | [5]       |
| <i>Thermococcus gammatolerans</i> Ej3    | Cd (II) | 2 mM                   | <i>Ex situ</i> laboratory assay                                                                         | Cd tolerance is caused by the coding of about a hundred genes that are expressed 120 minutes after Cd exposure                                            | [6]       |
|                                          | Co (II) | 2 mM                   |                                                                                                         |                                                                                                                                                           |           |
|                                          | Zn (II) | 2 mM                   |                                                                                                         |                                                                                                                                                           |           |
|                                          | Ni (II) | 0.5 mM                 |                                                                                                         |                                                                                                                                                           |           |
|                                          | Cu (II) | 0.5 mM                 |                                                                                                         |                                                                                                                                                           |           |
|                                          | As (II) | 0.25 mM                |                                                                                                         |                                                                                                                                                           |           |
| <i>Methanosarcina acetivorans</i> C2A    | Cd (II) | 100 µM                 | <i>Ex situ</i> laboratory assay                                                                         | Cd induces methanogenesis                                                                                                                                 | [7]       |

|                                       |         |           |                                 |                                                                                         |     |
|---------------------------------------|---------|-----------|---------------------------------|-----------------------------------------------------------------------------------------|-----|
| <i>Sulfolobus metallicus</i> DSM 6482 | Cd (II) | 5 mM      | <i>Ex situ</i> laboratory assay | ATPases efflux heavy metals outwards the cell to detoxify the intracellular environment | [8] |
| <i>Sulfolobus solfataricus</i>        | Cu (II) | >200 mM   |                                 |                                                                                         |     |
|                                       | Cd (II) | < 0.05 mM |                                 |                                                                                         |     |
|                                       | Cu (II) | NS        |                                 |                                                                                         |     |

**Table S2.** ICP-OES and ICP-MS operating conditions.

|                                            | ICP-OES                                                                                                       | ICP-MS                                                                                                                                                                                          |
|--------------------------------------------|---------------------------------------------------------------------------------------------------------------|-------------------------------------------------------------------------------------------------------------------------------------------------------------------------------------------------|
| Plasma forward power (W)                   | 1400                                                                                                          | 1550                                                                                                                                                                                            |
| Argon flow rate (L min <sup>-1</sup> )     |                                                                                                               |                                                                                                                                                                                                 |
| Plasma                                     | 15                                                                                                            | 15                                                                                                                                                                                              |
| Auxiliary                                  | 1.50                                                                                                          | 0.90                                                                                                                                                                                            |
| Nebulizer                                  | 0.70                                                                                                          | 1.09                                                                                                                                                                                            |
| Sample uptake rate (mL min <sup>-1</sup> ) | 0.5                                                                                                           | 0.3                                                                                                                                                                                             |
| View mode                                  | Axial                                                                                                         | -                                                                                                                                                                                               |
| Cell gas                                   |                                                                                                               | He                                                                                                                                                                                              |
| Cell gas flow (mL min <sup>-1</sup> )      |                                                                                                               | 4                                                                                                                                                                                               |
| Number of replicates                       | 3                                                                                                             | 3                                                                                                                                                                                               |
| Scanning mode                              | -                                                                                                             | Peak Jump                                                                                                                                                                                       |
| Points per Peak                            | -                                                                                                             | 3                                                                                                                                                                                               |
| Dwell time (μs)                            | -                                                                                                             | 150                                                                                                                                                                                             |
| Number of sweeps                           | -                                                                                                             | 40                                                                                                                                                                                              |
| Element (wavelength, nm) / Nuclide         | Ca (422.673); Cd (226.502); Fe (238.204); K (404.721); Mg (285.213); Mn (257.610); Na (588.995); Zn (213.857) | <sup>27</sup> Al <sup>±</sup> ; <sup>59</sup> Co <sup>±</sup> ; <sup>63</sup> Cu <sup>2±</sup> ; <sup>60</sup> Ni <sup>±</sup> ; <sup>88</sup> Sr <sup>±</sup> ; <sup>137</sup> Ba <sup>±</sup> |
| Internal standard                          | Sc (391.182, 361.383)                                                                                         | <sup>101</sup> Ru <sup>±</sup>                                                                                                                                                                  |

**Table S3.** Summary of ANOVA results for elemental variation analysis according to the different Cd treatments (0, 0.2 and 0.4 mM of Cd (II)).

| Source of variance | F-value (F <sub>2,6</sub> ) | p-value | Tukey HSD test              |
|--------------------|-----------------------------|---------|-----------------------------|
| Al                 | 0.002                       | n.s.    | -                           |
| Ba                 | 1.529                       | n.s.    | -                           |
| Ca                 | 30.51                       | n.s.    | -                           |
| Co                 | 0.647                       | n.s.    | -                           |
| Cu                 | 1.146                       | n.s.    | -                           |
| Fe                 | 1.465                       | n.s.    | -                           |
| K                  | 5.802                       | < 0.05  | 0 < 0.2; 0.2 = 0.4; 0 = 0.4 |
| Mg                 | 6.035                       | < 0.05  | 0 = 0.2; 0.2 = 0.4; 0 > 0.4 |
| Mn                 | 98.730                      | < 0.001 | 0 < 0.2 < 0.4               |
| Na                 | 4.473                       | n.s.    | -                           |
| Ni                 | 1.885                       | n.s.    | -                           |
| Sr                 | 3.709                       | n.s.    | -                           |
| Zn                 | 114.300                     | < 0.001 | 0 > 0.2 > 0.4               |

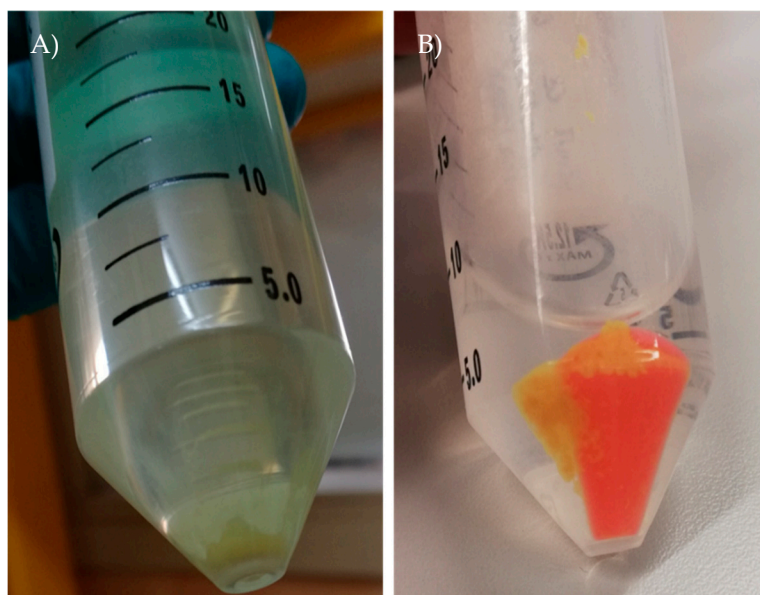

**Figure S1.** Appearance of the yellow precipitate CdS in CM. **A)** No centrifuged CM without cells and **B)** centrifuged CM with cells. Note: pink pellet corresponds to the cell biomass.

## References

1. Aguilera, A.; Amils, R. Tolerance to cadmium in *Chlamydomonas* sp. (Chlorophyta) strains isolated from an extreme acidic environment, the Tinto River (SW, Spain). *Aquat. Toxicol.* **2005**, *75*, 316–329. <https://doi.org/10.1016/j.aquatox.2005.09.00>.
2. Baillet, F.; Magnin, J.P.; Cheruy, A.; Ozil, P. Cadmium Tolerance and Uptake by a *Thiobacillus ferrooxidans* Biomass. *Environ. Technol.* **1997**, *18*, 631–638. <https://doi.org/10.1080/09593331808616581>.
3. Chaudhary, A.; Pasha, M.I.; Salgaonkar, B.B.; Braganca, J.M. Cadmium Tolerance by Haloarchaeal Strains Isolated from Solar Salterns of Goa, India. *Int. J. Biosci. Biochem. Bioinf.* **2014**, *4*, 1–6. <https://doi.org/10.7763/ijbbb.2014.v4.299>.
4. Chackraborty, J.; Das, S. Characterization and cadmium-resistant gene expression of biofilm-forming marine bacterium *Pseudomonas aeruginosa* JP-11. *Environ. Sci. Pollut. Res.* **2014**, *21*, 14188–14201. <https://doi.org/10.1007/s11356-014-3308-7>.
5. Palanivel, T.M.; Sivakumar, N.; Al-Ansari, A.; Victor, R. Bioremediation of copper by active cells of *Pseudomonas stutzeri* LA3 isolated from an abandoned copper mine soil. *J. Environ. Manag.* **2020**, *253*, 109706. <https://doi.org/10.1016/j.jenvman.2019.109706>.
6. Lagorce, A.; Fourçans, A.; Dutertre, M.; Bouyssièr, B.; Zivanovic, Y.; Confalonieri, F. Genome-wide transcriptional response of the Archaeon *Thermococcus gammatolerans* to Cadmium. *PLoS ONE* **2012**, *7*, e41935. <https://doi.org/10.1371/journal.pone.0041935>.
7. Lira-Silva, E.; Santiago-Martínez, M.G.; Hernández-Juárez, V.; García-Contreras, R.; Moreno-Sánchez, R.; Jasso-Chávez, R. Activation of Methanogenesis by Cadmium in the Marine Archaeon *Methanosarcina acetivorans*. *PLoS ONE* **2012**, *7*, e48779. <https://doi.org/10.1371/journal.pone.0048779>.
8. Orell, A.; Remonsellez, F.; Arancibia, R.; Jerez, C.A. Molecular Characterization of Copper and Cadmium Resistance Determinants in the Biomining Thermoacidophilic Archaeon *Sulfolobus metallicus*. *Archaea* **2013**, *2013*, 289236. <https://doi.org/10.1155/2013/289236>.
